# Supplementary material for: Analysis of multiple-period group randomized trials: random coefficients model or repeated measures ANOVA?
Source: PubMed Central journal article supplement (PMC9727985; doi:10.1186/s13063-022-06917-2), 2022-12-07
Supplement: 13063_2022_6917_MOESM2_ESM.pdf [file 13063_2022_6917_MOESM2_ESM.pdf]

# 1 Time by Group Analytic Models

Table 1: Time x Group, KR ddf

| M  | Analytic Model | RM-ANOVA |       |       |                 |       |       | RC     |       |       |                 |       |       |
|----|----------------|----------|-------|-------|-----------------|-------|-------|--------|-------|-------|-----------------|-------|-------|
|    |                | Cohort   |       |       | Cross-Sectional |       |       | Cohort |       |       | Cross-Sectional |       |       |
|    |                | 0.001    | 0.010 | 0.100 | 0.001           | 0.010 | 0.100 | 0.001  | 0.010 | 0.100 | 0.001           | 0.010 | 0.100 |
| 10 | RM-ANOVA, VC   | 0.040    | 0.057 | 0.047 | 0.055           | 0.058 | 0.050 | 0.067  | 0.102 | 0.133 | 0.049           | 0.064 | 0.127 |
|    | RM-ANOVA, UN   | 0.039    | 0.057 | 0.046 | 0.061           | 0.058 | 0.050 | 0.052  | 0.154 | 0.157 | 0.054           | 0.051 | 0.054 |
|    | RC             | 0.051    | 0.051 | 0.050 | 0.040           | 0.046 | 0.043 | 0.037  | 0.048 | 0.050 | 0.049           | 0.049 | 0.056 |
|    | Saturated      | 0.045    | 0.047 | 0.048 | 0.061           | 0.058 | 0.043 | 0.045  | 0.047 | 0.036 | 0.054           | 0.051 | 0.054 |
| 20 | RM-ANOVA, VC   | 0.052    | 0.048 | 0.058 | 0.035           | 0.048 | 0.047 | 0.087  | 0.109 | 0.135 | 0.052           | 0.059 | 0.101 |
|    | RM-ANOVA, UN   | 0.055    | 0.049 | 0.058 | 0.044           | 0.048 | 0.046 | 0.064  | 0.151 | 0.159 | 0.050           | 0.038 | 0.047 |
|    | RC             | 0.052    | 0.048 | 0.052 | 0.042           | 0.052 | 0.045 | 0.060  | 0.050 | 0.051 | 0.061           | 0.050 | 0.039 |
|    | Saturated      | 0.058    | 0.052 | 0.055 | 0.044           | 0.048 | 0.046 | 0.053  | 0.041 | 0.050 | 0.050           | 0.038 | 0.047 |
| 40 | RM-ANOVA, VC   | 0.064    | 0.042 | 0.057 | 0.052           | 0.058 | 0.047 | 0.069  | 0.094 | 0.124 | 0.047           | 0.057 | 0.115 |
|    | RM-ANOVA, UN   | 0.065    | 0.043 | 0.057 | 0.064           | 0.059 | 0.049 | 0.057  | 0.140 | 0.149 | 0.041           | 0.042 | 0.047 |
|    | RC             | 0.043    | 0.057 | 0.066 | 0.043           | 0.054 | 0.052 | 0.047  | 0.043 | 0.047 | 0.035           | 0.038 | 0.050 |
|    | Saturated      | 0.070    | 0.043 | 0.060 | 0.064           | 0.059 | 0.049 | 0.043  | 0.057 | 0.059 | 0.041           | 0.042 | 0.047 |

Table 2: Time x Group, BW ddf

| M  | Analytic Model | RM-ANOVA |       |       |                 |       |       | RC     |       |       |                 |       |       |
|----|----------------|----------|-------|-------|-----------------|-------|-------|--------|-------|-------|-----------------|-------|-------|
|    |                | Cohort   |       |       | Cross-Sectional |       |       | Cohort |       |       | Cross-Sectional |       |       |
|    |                | 0.001    | 0.010 | 0.100 | 0.001           | 0.010 | 0.100 | 0.001  | 0.010 | 0.100 | 0.001           | 0.010 | 0.100 |
| 10 | RM-ANOVA, VC   | 0.042    | 0.043 | 0.056 | 0.055           | 0.058 | 0.050 | 0.067  | 0.102 | 0.134 | 0.049           | 0.065 | 0.127 |
|    | RM-ANOVA, UN   | 0.048    | 0.046 | 0.056 | 0.141           | 0.131 | 0.134 | 0.054  | 0.162 | 0.160 | 0.133           | 0.141 | 0.142 |
|    | RC             | 0.055    | 0.042 | 0.045 | 0.040           | 0.046 | 0.043 | 0.037  | 0.048 | 0.050 | 0.049           | 0.049 | 0.056 |
|    | Saturated      | 0.138    | 0.144 | 0.140 | 0.141           | 0.131 | 0.134 | 0.126  | 0.127 | 0.113 | 0.133           | 0.141 | 0.142 |
| 20 | RM-ANOVA, VC   | 0.053    | 0.050 | 0.049 | 0.035           | 0.047 | 0.046 | 0.086  | 0.109 | 0.134 | 0.052           | 0.059 | 0.100 |
|    | RM-ANOVA, UN   | 0.054    | 0.048 | 0.049 | 0.069           | 0.082 | 0.087 | 0.064  | 0.152 | 0.159 | 0.080           | 0.062 | 0.078 |
|    | RC             | 0.047    | 0.048 | 0.052 | 0.042           | 0.052 | 0.045 | 0.060  | 0.050 | 0.051 | 0.061           | 0.050 | 0.039 |
|    | Saturated      | 0.088    | 0.084 | 0.094 | 0.069           | 0.082 | 0.087 | 0.086  | 0.085 | 0.077 | 0.080           | 0.062 | 0.078 |
| 40 | RM-ANOVA, VC   | 0.044    | 0.042 | 0.041 | 0.052           | 0.056 | 0.047 | 0.068  | 0.094 | 0.124 | 0.047           | 0.057 | 0.115 |
|    | RM-ANOVA, UN   | 0.044    | 0.041 | 0.042 | 0.081           | 0.074 | 0.064 | 0.057  | 0.141 | 0.149 | 0.056           | 0.056 | 0.062 |
|    | RC             | 0.054    | 0.047 | 0.049 | 0.043           | 0.054 | 0.052 | 0.047  | 0.043 | 0.047 | 0.035           | 0.038 | 0.050 |
|    | Saturated      | 0.061    | 0.060 | 0.062 | 0.081           | 0.074 | 0.064 | 0.054  | 0.063 | 0.075 | 0.056           | 0.056 | 0.062 |

## 2 Group Intercept Analytic Models

Table 3: Group Intercept, KR ddf

| M  | Analytic Model | RM-ANOVA |       |       |                 |       |       | RC     |       |       |                 |       |       |
|----|----------------|----------|-------|-------|-----------------|-------|-------|--------|-------|-------|-----------------|-------|-------|
|    |                | Cohort   |       |       | Cross-Sectional |       |       | Cohort |       |       | Cross-Sectional |       |       |
|    |                | 0.001    | 0.010 | 0.100 | 0.001           | 0.010 | 0.100 | 0.001  | 0.010 | 0.100 | 0.001           | 0.010 | 0.100 |
| 10 | RM-ANOVA, VC   | 0.061    | 0.225 | 0.845 | 0.047           | 0.103 | 0.536 | 0.101  | 0.307 | 0.676 | 0.054           | 0.179 | 0.601 |
|    | RM-ANOVA, UN   | 0.061    | 0.218 | 0.849 | 0.047           | 0.103 | 0.536 | 0.059  | 0.209 | 0.556 | 0.054           | 0.179 | 0.601 |
|    | RC             | 0.059    | 0.129 | 0.444 | 0.047           | 0.064 | 0.266 | 0.087  | 0.282 | 0.648 | 0.073           | 0.260 | 0.683 |
| 20 | RM-ANOVA, VC   | 0.064    | 0.217 | 0.834 | 0.033           | 0.093 | 0.551 | 0.105  | 0.309 | 0.696 | 0.063           | 0.162 | 0.556 |
|    | RM-ANOVA, UN   | 0.064    | 0.218 | 0.832 | 0.033           | 0.093 | 0.551 | 0.069  | 0.198 | 0.567 | 0.063           | 0.162 | 0.556 |
|    | RC             | 0.050    | 0.125 | 0.446 | 0.045           | 0.073 | 0.247 | 0.092  | 0.282 | 0.674 | 0.078           | 0.254 | 0.643 |
| 40 | RM-ANOVA, VC   | 0.080    | 0.228 | 0.856 | 0.061           | 0.105 | 0.531 | 0.092  | 0.309 | 0.681 | 0.056           | 0.164 | 0.577 |
|    | RM-ANOVA, UN   | 0.079    | 0.227 | 0.857 | 0.061           | 0.105 | 0.531 | 0.061  | 0.184 | 0.576 | 0.056           | 0.164 | 0.577 |
|    | RC             | 0.044    | 0.142 | 0.459 | 0.040           | 0.075 | 0.270 | 0.076  | 0.275 | 0.642 | 0.056           | 0.241 | 0.672 |

Table 4: Group Intercept, BW ddf

| M  | Analytic Model | RM-ANOVA |       |       |                 |       |       | RC     |       |       |                 |       |       |
|----|----------------|----------|-------|-------|-----------------|-------|-------|--------|-------|-------|-----------------|-------|-------|
|    |                | Cohort   |       |       | Cross-Sectional |       |       | Cohort |       |       | Cross-Sectional |       |       |
|    |                | 0.001    | 0.010 | 0.100 | 0.001           | 0.010 | 0.100 | 0.001  | 0.010 | 0.100 | 0.001           | 0.010 | 0.100 |
| 10 | RM-ANOVA, VC   | 0.033    | 0.075 | 0.514 | 0.040           | 0.093 | 0.503 | 0.088  | 0.298 | 0.670 | 0.046           | 0.167 | 0.582 |
|    | RM-ANOVA, UN   | 0.036    | 0.073 | 0.516 | 0.040           | 0.093 | 0.503 | 0.051  | 0.194 | 0.548 | 0.046           | 0.167 | 0.582 |
|    | RC             | 0.042    | 0.053 | 0.230 | 0.031           | 0.047 | 0.231 | 0.061  | 0.261 | 0.630 | 0.050           | 0.233 | 0.666 |
| 20 | RM-ANOVA, VC   | 0.048    | 0.077 | 0.545 | 0.031           | 0.089 | 0.538 | 0.103  | 0.302 | 0.694 | 0.057           | 0.152 | 0.553 |
|    | RM-ANOVA, UN   | 0.048    | 0.074 | 0.547 | 0.031           | 0.089 | 0.538 | 0.068  | 0.188 | 0.558 | 0.057           | 0.152 | 0.553 |
|    | RC             | 0.042    | 0.066 | 0.252 | 0.035           | 0.064 | 0.235 | 0.082  | 0.268 | 0.661 | 0.070           | 0.239 | 0.633 |
| 40 | RM-ANOVA, VC   | 0.044    | 0.087 | 0.511 | 0.059           | 0.101 | 0.525 | 0.087  | 0.301 | 0.680 | 0.054           | 0.158 | 0.575 |
|    | RM-ANOVA, UN   | 0.045    | 0.090 | 0.512 | 0.059           | 0.101 | 0.525 | 0.055  | 0.179 | 0.571 | 0.054           | 0.158 | 0.575 |
|    | RC             | 0.055    | 0.062 | 0.242 | 0.038           | 0.070 | 0.264 | 0.073  | 0.270 | 0.637 | 0.050           | 0.233 | 0.664 |

### 3 Data Generation Mechanism with no Time x Group Random Effect

Table 5: Cross-Sectional DGM with only Group Intercept variation and no Time x Group variation

| Analytic Model   | M  | Group-Intercept |       |       | Time x Group |       |       |
|------------------|----|-----------------|-------|-------|--------------|-------|-------|
|                  |    | 0.001           | 0.010 | 0.100 | 0.001        | 0.010 | 0.100 |
| RC               | 10 | 0.066           | 0.041 | 0.049 | 0.060        | 0.034 | 0.043 |
|                  | 20 | 0.047           | 0.040 | 0.051 | 0.038        | 0.036 | 0.047 |
|                  | 40 | 0.045           | 0.050 | 0.059 | 0.046        | 0.050 | 0.058 |
| RM-ANOVA with UN | 10 | 0.058           | 0.047 | 0.057 | 0.054        | 0.040 | 0.049 |
|                  | 20 | 0.051           | 0.045 | 0.056 | 0.056        | 0.044 | 0.055 |
|                  | 40 | 0.053           | 0.060 | 0.060 | 0.049        | 0.062 | 0.054 |
| RM-ANOVA with VC | 10 | 0.058           | 0.047 | 0.057 | 0.060        | 0.037 | 0.049 |
|                  | 20 | 0.051           | 0.045 | 0.056 | 0.052        | 0.045 | 0.053 |
|                  | 40 | 0.053           | 0.060 | 0.060 | 0.049        | 0.062 | 0.061 |
| Saturated        | 10 | -               | -     | -     | 0.054        | 0.040 | 0.049 |
|                  | 20 | -               | -     | -     | 0.056        | 0.044 | 0.055 |
|                  | 40 | -               | -     | -     | 0.049        | 0.062 | 0.054 |

Table 6: Cohort

| Analytic Model | M  | RM-ANOVA        |       |               |       | RC              |       |               |       |
|----------------|----|-----------------|-------|---------------|-------|-----------------|-------|---------------|-------|
|                |    | Group Intercept |       | Time by Group |       | Group Intercept |       | Time by Group |       |
|                |    | 0.010           | 0.100 | 0.010         | 0.100 | 0.010           | 0.100 | 0.010         | 0.100 |
| RM-ANOVA, VC   | 10 | 0.059           | 0.048 | 0.064         | 0.051 | 0.059           | 0.058 | 0.062         | 0.069 |
|                | 20 | 0.053           | 0.056 | 0.055         | 0.06  | 0.068           | 0.072 | 0.069         | 0.074 |
| RM-ANOVA, UN   | 10 | 0.058           | 0.045 | 0.065         | 0.05  | 0.036           | 0.049 | 0.033         | 0.046 |
|                | 20 | 0.054           | 0.058 | 0.056         | 0.058 | 0.058           | 0.047 | 0.05          | 0.047 |
| RC             | 10 | 0.063           | 0.046 | 0.067         | 0.05  | 0.038           | 0.056 | 0.043         | 0.053 |
|                | 20 | 0.053           | 0.052 | 0.052         | 0.052 | 0.052           | 0.047 | 0.051         | 0.045 |
| Saturated      | 10 | -               | -     | 0.053         | 0.049 | -               | -     | 0.042         | 0.048 |
|                | 20 | -               | -     | 0.062         | 0.061 | -               | -     | 0.051         | 0.045 |
